# Supplementary material for: Trace Elements in Soils and Selected Agricultural Plants in the Tongling Mining Area of China
Source: MDPI journal article supplement (doi:10.3390/ijerph15020202), 2018-01-25
Supplement: s1 [file s1]

**Table S1** Correlation coefficient ( $r$ ) of trace elements in the vegetables.

|    | Cu                       | Zn           | Pb           | Cd    | As    |
|----|--------------------------|--------------|--------------|-------|-------|
| Cu | 1.000                    |              |              |       |       |
| Zn | <b>0.910<sup>a</sup></b> | 1.000        |              |       |       |
| Pb | <b>0.642</b>             | <b>0.628</b> | 1.000        |       |       |
| Cd | <b>0.329</b>             | <b>0.151</b> | <b>0.212</b> | 1.000 |       |
| As | 0.044                    | 0.057        | -0.024       | 0.070 | 1.000 |

Note: <sup>a</sup> Bold  $r$ -values are significant at  $p < 0.01$ .
