# Supplementary material for: Trace Elements in Soils and Selected Agricultural Plants in the Tongling Mining Area of China
Source: MDPI journal article supplement (doi:10.3390/ijerph15020202), 2018-01-25
Supplement: s1 [file s1]

**Table S2**

Correlation coefficients between the trace element contents in fruit vegetables(mg kg<sup>-1</sup>,based on fresh weight) and in soil.

|                         | Cu     | Zn                  | Cd                   | Pb                 | As                  |
|-------------------------|--------|---------------------|----------------------|--------------------|---------------------|
| <i>C. annuum</i>        | 0.18   | 0.114               | 0.318 <sup>**a</sup> | 0.123              | -0.023              |
| <i>V. sesquipedalis</i> | 0.132  | 0.309 <sup>**</sup> | 0.403 <sup>**</sup>  | 0.236 <sup>*</sup> | 0.360 <sup>**</sup> |
| <i>S. melongena</i>     | 0.042  | 0.197               | 0.463 <sup>**</sup>  | 0.143              | 0.158               |
| <i>L. cylindrica</i>    | 0.045  | 0.144               | 0.439 <sup>**</sup>  | 0.017              | 0.085               |
| <i>G. max</i>           | -0.053 | 0.307               | 0.230                | 0.078              | 0.095               |
| <i>D. lablab</i>        | -0.121 | 0.241               | 0.247                | 0.305              | 0.191               |
| <i>L. esculentum</i>    | 0.327  | 0.106               | 0.663 <sup>**</sup>  | -0.154             | 0.205               |
| <i>C. sativus</i>       | 0.070  | -0.048              | 0.050                | -0.096             | 0.582 <sup>**</sup> |

Note: <sup>a</sup> \* and \*\*, Correlation is significant at the 0.05 and 0.01 probability levels, respectively.
