# Supplementary material for: Trace Elements in Soils and Selected Agricultural Plants in the Tongling Mining Area of China
Source: MDPI journal article supplement (doi:10.3390/ijerph15020202), 2018-01-25
Supplement: s1 [file s1]

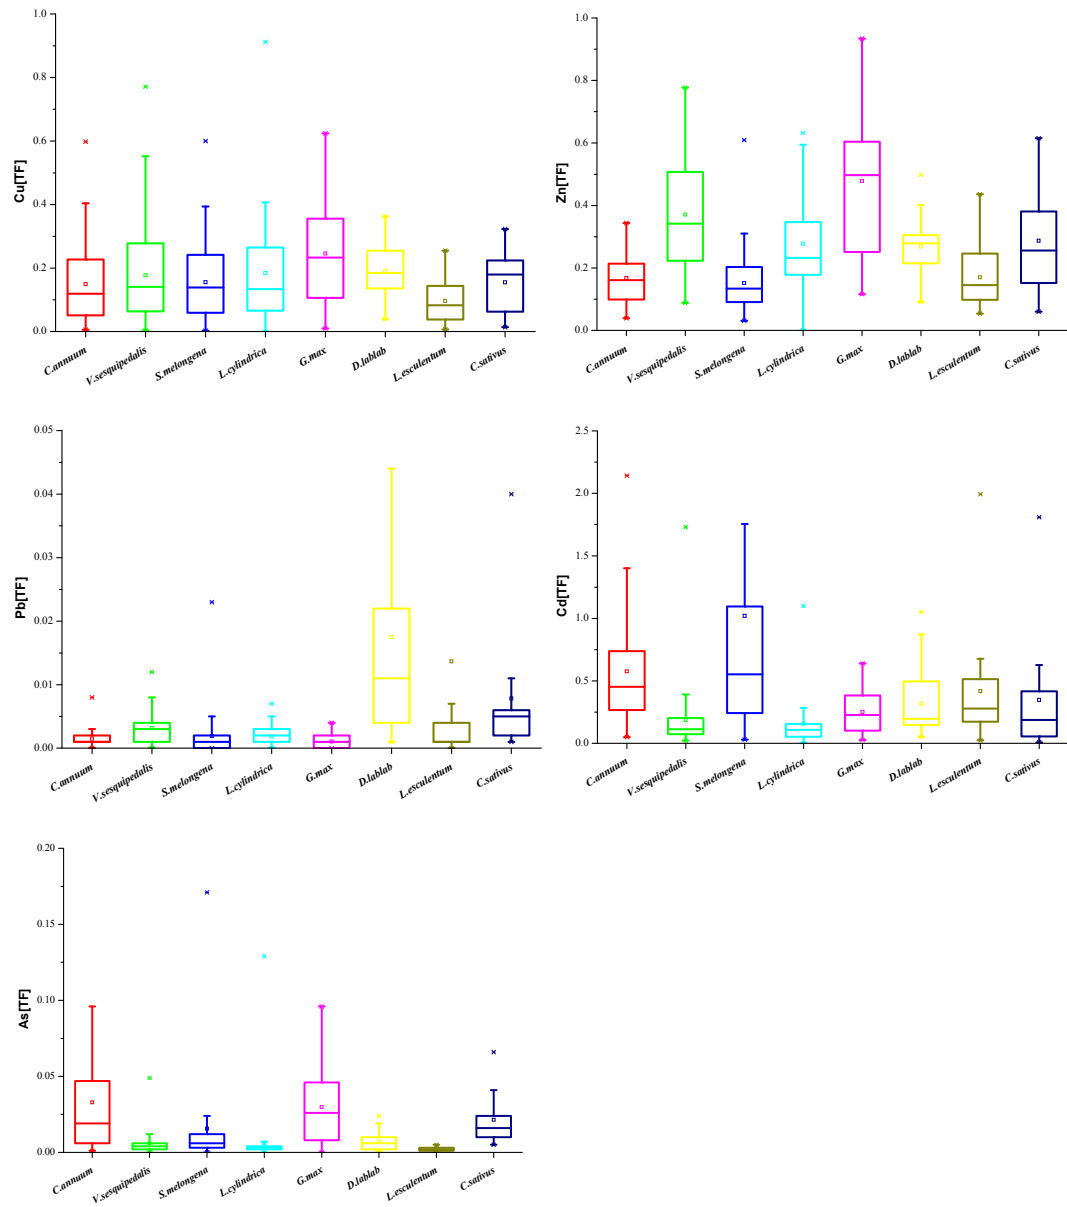

**Figure S1.** Box-Whisker plots of the transfer factor (TF) of heavy metals from soil to the edible part of different vegetables.
